# Supplementary material
Source: HighWire-hosted journal article supplement (https://bmjopen.bmj.com/content/14/12/e085211)
Supplement: inline-supplementary-material-1 [file inline-supplementary-material-1.pdf]

Version 1.1 10.03.23

**Nurse and Health Administrator interview guide**

Participant ID: \_\_\_\_\_

Health Facility: \_\_\_\_\_ Date: \_\_\_\_\_

Good morning/afternoon

You are welcome to this discussion. My name is \_\_\_\_\_

I am a researcher from the Africa University College of Health, Agriculture, and Natural Resources. Thank you for accepting to interview with us. We would like to have a discussion on your perceptions of the barriers and facilitators as well as the feasibility of blood pressure management and patient education about hypertension as delivered by Community Health Workers (CHWs) among people with hypertension. CHWs will be trained before implementation. During the discussion, we will solicit perceptions regarding appropriateness, discontinuation, satisfaction, facilitators, and barriers to the implementation of the intervention in Mutare City. The purpose of this discussion is to get your views and take appropriate steps in our plans to implement the intervention in Mutare City. The recommendations will also help healthcare providers and the Ministry of Health and Child Care understand the feasibility of integrating Community Health Worker-delivered home management of hypertension intervention into routine care.

**Sociodemographic information**

1. How old are you (*in completed years*)? \_\_\_\_\_
2. What is your sex?                      Male [ ]                      Female [ ]
3. Do you have a working mobile phone?                      Yes [ ]                      No [ ]
4. What is your highest level of education?
  - a. None [ ]
  - b. Primary [ ]
  - c. Secondary [ ]
  - d. Diploma [ ]
  - e. Undergraduate degree [ ]
  - f. Masters/ Doctoral studies [ ]
5. What is your religion?
  - a. Pentecostal [ ]
  - b. Protestant [ ]
  - c. Apostolic [ ]

Version 1.1 10.03.23

- d. Moslem [ ]
- e. Africa traditional religion [ ]
- f. None [ ]

6. How long (in years) have you worked with patients as a nurse/administrator? [ ]

### **In-depth Interview Questions**

1. In Zimbabwe, many individuals living with chronic hypertension need continuous monitoring and health education. We would like to utilize trained community health workers (CHWs) instead of professional health providers like nurses. What do you think about this method of managing hypertension and patient education?

2. In your opinion, what are the:

- a. enablers/facilitators of hypertension-related patient monitoring and counseling delivered by CHWs in urban communities?
- b. barriers of hypertension-related patient monitoring and counseling delivered by CHWs in urban communities?

3. What are the benefits of using CHWs for hypertension-centered management and patient education among hypertension patients?

4. How sustainable will a CHW-delivered blood pressure measurement and patient education among hypertension patients be?

Explain your answer.

5. Are there any cultural or community practices related to patient education on Hypertension that may affect the use of CHWs for this intervention?

If yes, how do those practices affect the patient education program on hypertension? (*Probe further about traditions and beliefs around patient education by CHWs*)

6. What suggestions do you think would increase CHWs' ability to educate hypertension patients in the community?

7. What key issues do we need to consider in making home management of hypertension by trained CHWs acceptable by the:

- a. patients
- b. community
- c. professional health workers

8. In the past six months, have you received adequate medication to allow for multiple-month dispensing and the availability of medication for local hypertension patients?

Version 1.1 10.03.23

10. How often do you get antihypertensive supplies as Mutare City Health Department?
11. How have you been supporting hypertension patients with challenges in frequenting this clinic per set medical timelines?
12. How often do you expect hypertensive patients to visit clinics for routine check-ups?
13. How frequently do you feel comfortable supporting CHWs carrying out BP management to community members?
14. What type of individual do you recommend for recruiting as a CHW to support hypertension patients?  
(Probe: Gender, Age, Education, Residence status, Attitudes and behavior)
15. What training do you think CHWs need to effectively provide home hypertension management?
16. What support mechanisms are needed to ensure CHWs can timely activate referrals before further complications?
17. Do you see it appropriate for CHWs to collect antihypertensive on behalf of the patients? Explain your answer.
18. As a nurse/ administrator, how do you plan to communicate, engage, and support CHWs involved in the home management of hypertension?
19. Do you have any additional suggestions on strategies to make this program successful?
20. Do you have any questions for me?

THANK YOU FOR YOUR TIME
