# Supplementary material
Source: HighWire-hosted journal article supplement (https://bmjopen.bmj.com/content/14/12/e085211)
Supplement: inline-supplementary-material-2 [file inline-supplementary-material-2.pdf]

Version 1.1 10/3/23

## Community Health Worker Interview guide

### Socio-demographic information

Participant ID: \_\_\_\_\_

Health Facility: \_\_\_\_\_ Date: \_\_\_\_\_

Good morning/afternoon

You are welcome to this discussion. My name is \_\_\_\_\_

I am a researcher from the Africa University College of Health, Agriculture, and Natural Resources. Thank you for accepting to interview with us. We would like to have a discussion on your perceptions of the barriers and facilitators as well as the feasibility of blood pressure management and patient education about hypertension as delivered by Community Health Workers among people with hypertension. CHWs will be trained before implementation. During the discussion, we will solicit perceptions regarding appropriateness, discontinuation, satisfaction, facilitators, and barriers to the implementation of the intervention in Mutare City. The purpose of this discussion is to get your views and take appropriate steps in our plans to implement the intervention in Mutare City. The recommendations will also help healthcare providers and the Ministry of Health and Child Care understand the feasibility of integrating Community Health Worker-delivered home management of hypertension intervention into routine care.

1. How old are you (*in completed years*)? \_\_\_\_\_

2. What is your sex? Male ☐ Female ☐

3. Do you have a working mobile phone? Yes ☐ No ☐

4. What is your highest level of education?

a. None ☐

b. Primary ☐

c. Secondary ☐

d. Diploma ☐

e. Undergraduate degree ☐

f. Masters/ Doctoral studies ☐

5. What is your religion?

a. Pentecostal ☐

b. Protestant ☐

c. Apostolic ☐

Version 1.1 10/3/23

d. Moslem [ ]

e. Africa traditional religion [ ]

f. None [ ]

**Experience in providing community-driven patient services**

6. How many years have you been working with patients in the community? \_\_\_\_\_

7. Do you have any of the following medical conditions? (*Tick all that apply*)

| Disease                               | YES | NO |
|---------------------------------------|-----|----|
| Hypertension                          |     |    |
| Diabetes Mellitus                     |     |    |
| Asthma                                |     |    |
| Chronic obstructive pulmonary disease |     |    |
| Cancer                                |     |    |
| Kidney disease                        |     |    |
| Musculoskeletal disease               |     |    |
| Stroke                                |     |    |
| HIV/AIDS                              |     |    |
| Other ( <i>specify</i> )              |     |    |

8. What distance are you comfortable/capable of traveling to support patients? [ ]

9. Estimate the time you can be able to commit to support hypertension patients in a week (in hours) [ ]

10. From your experience as a Community Health Workers, do you think you have the basic skills to support hypertensive patients?

Yes [ ] No [ ]

Please explain your answer

11. Have you ever used a BP machine before? Yes [ ] No [ ]

12. Are you able to interpret BP readings? Yes [ ] No [ ]

13. Are you trained in the following:

a. Patient counseling? Yes [ ] No [ ]

b. Referring hypertensive patients? Yes [ ] No [ ]

c. Recommended lifestyle behaviors for people living with hypertension?

Yes [ ] No [ ]

Version 1.1 10/3/23

14. How frequently are you comfortable visiting/ meeting nurses to discuss issues to do with hypertensive patients' care and support?

a. Days per week [ ]

b. Days per month [ ]

Explain your answer.

15. Do you think the management of hypertension by Community Health Workers will be:

a. Successful? Yes [ ] No [ ] Explain your answer.

b. Effective? Yes [ ] No [ ] Explain your answer.

16. What kind of support would you need to provide health services to hypertensive patients in your community?

17. What skills should the Community Health Worker possess to offer effective home management of hypertension services?

18. What kind of training would enhance the effective execution of the proposed duties and responsibilities?

19. In terms of supervision, how often do you want to be supervised by the following key cadres in your work supporting patients by nurses and why?

a. clinic nurse

b. community nurse

c. CHW coordinator

20. What do you consider to be the factors that may lead to program success at the:

a. patient level?

b. Community Health Worker level?

c. health provider level?

21. What do you consider to be the factors that may lead to program success at the:

a. patient level?

Version 1.1 10/3/23

b. Community Health Worker level?

c. health provider level?

22. Do you have any additional suggestions on strategies to make this program successful?

23. Do you have any questions for me?

THANK YOU FOR YOUR TIME
